# Supplementary material for: The remarkable catalytic activity of ultra-small free-CeO2 nanoparticles in selective carbon–carbon bond formation reactions in water at room temperature
Source: Royal Society of Chemistry journal article supplement (doi:10.1039/c5nj00500k), 2015-01-01
Supplement: c5nj00500k1.pdf [file c5nj00500k1.pdf]

Supporting Information 1

**Title: Remarkable catalytic activity of ultra small free-CeO<sub>2</sub> nanoparticles in selective carbon-carbon bond formation reactions in water at room temperature**

**Author: Subhash Banerjee\***

**Reagents and solvents:**

All the active methylene compounds, conjugated alkenes, Cerium nitrate and ammonium hydroxide were purchased from Sigma-Aldrich and were used as received. Ethyl acetate, ethanol and hexane were purchased from FisherSci used as received. DI water was used for reaction purpose. The NMR spectra were measured in chloroform-*d* (CDCl<sub>3</sub>) solvent in a Varian 500 NMR instrument. FT-IR spectra were recorded in Perkin-Elmer instrument in neat conditions. The nanoparticles (NPs) were characterized by TEM, XRD and XPS studies.

**ESI-1: Synthesis of dextran coated cerium oxide NPs:**

A solution containing 5.0mL of 1.0 M cerium (III) nitrate and 10.0mL of 1.0 M dextran T-10 was added drop by drop to a 30.0 mL ammonium hydroxide solution (Sigma Aldrich, 30%) and stirred for 24 h at 25 °C. The color of the solution changed from light yellow to dark brown, indicating the formation of stabilized dextran-coated CeO<sub>2</sub> NPs. Afterwards, the solution was centrifuged for two 30 min cycles to settle any debris and large agglomerates. Finally, the centrifuged solution was purified from free dextran and concentrated using an Amicon cell (YM 30 K; Millipore Inc).

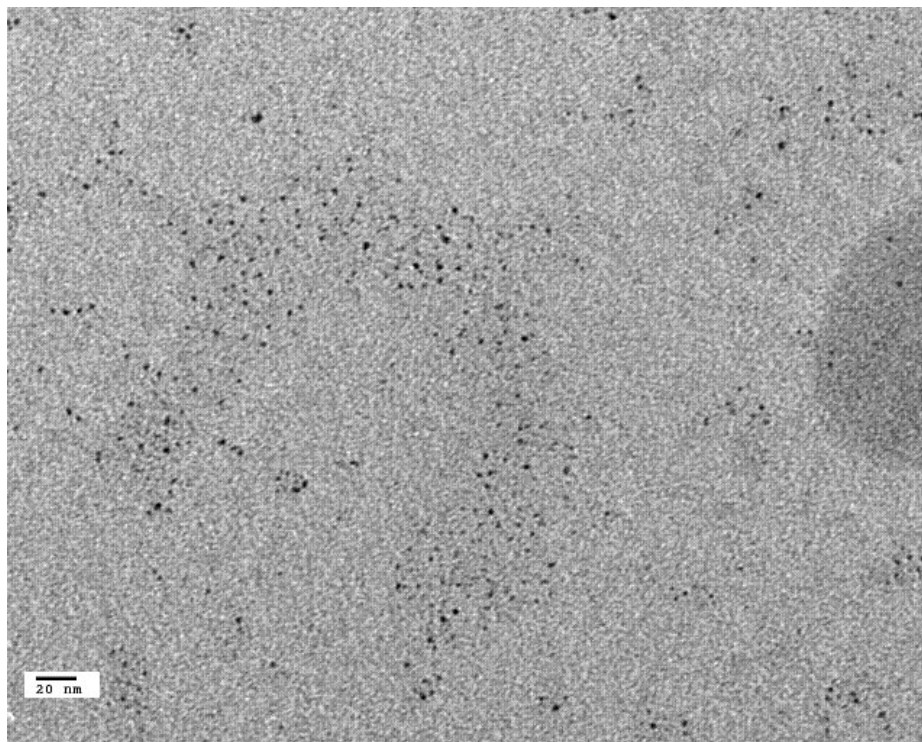

**Fig. 1S** TEM image of dextran coated CeO<sub>2</sub> NPs (DCNPs; size ~ 2-5 nm).

### **ESI-2: Synthesis and characterization of free-CeO<sub>2</sub> NPs:**

#### **(i) Synthesis of free-CeO<sub>2</sub> NPs:**

A solution containing 5.0mL of 1.0 M cerium (III) nitrate was added drop by drop to a 30.0 mL ammonium hydroxide solution and stirred for 24 h at room temperature. The solution was centrifuged and washed with ethanol-water mixture to remove the excess reagents. Finally, the formation of crystalline nanoceria was confirmed by TEM, XRD and XPS analysis.

#### **(ii) Autocatalytic Study:**

To check the oxidation state of prepared CeO<sub>2</sub>NPs, we have tested the by the treatment of hydrogen peroxide (H<sub>2</sub>O<sub>2</sub>) as an oxidizer. We observed a color change of form light yellow to red upon treatment with H<sub>2</sub>O<sub>2</sub>. The red color slowly faded way with time and back to its original light yellow color after ten days (**Fig. 2S**).

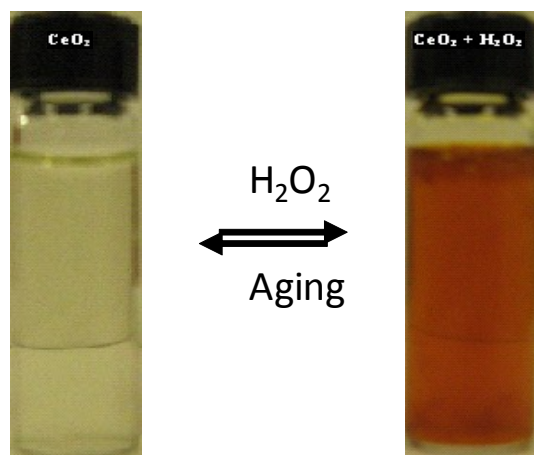

**Fig. 2S** The digital image of the aqueous solution of the CeO<sub>2</sub> NPs in absence and presence of H<sub>2</sub>O<sub>2</sub> showing autocatalytic activity.

**(iii) XPS Study:**

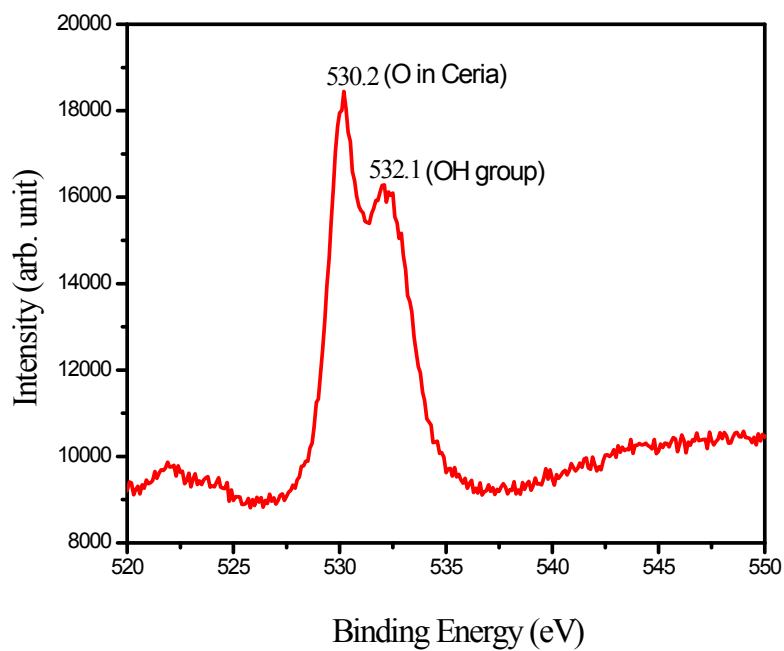

**Fig. 3S** High resolution XPS spectrum of O1s.

## ESI 3:

## (i) Optimization of reaction Conditions:

**Table 1S** Standardization of reaction conditions using the model reaction between dimedone and MVK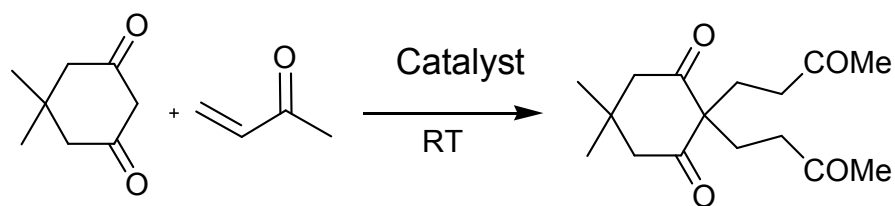

| entry | reaction medium               | catalyst (mol %) | time (h) | Yield (%) <sup>a</sup> |
|-------|-------------------------------|------------------|----------|------------------------|
| 1     | H <sub>2</sub> O <sup>b</sup> | 20 <sup>c</sup>  | 24       | 40                     |
| 2     | H <sub>2</sub> O <sup>b</sup> | 5 <sup>d</sup>   | 3        | 90                     |
| 3     | H <sub>2</sub> O <sup>b</sup> | -                | 24       | -                      |
| 4     | Neat                          | 5 <sup>d</sup>   | 12       | 50                     |
| 5     | Ethanol                       | 5 <sup>d</sup>   | 12       | 75                     |
| 6     | THF                           | 5 <sup>d</sup>   | 12       | 35                     |
| 7     | Toluene                       | 5 <sup>d</sup>   | 12       | 20                     |
| 8     | CH <sub>3</sub> CN            | 5 <sup>d</sup>   | 12       | 45                     |

<sup>a</sup>Isolated yield. <sup>b</sup>Reactions were carried out using 1 ml of DI H<sub>2</sub>O. <sup>c</sup>Reactions were carried out using dextran coated CeO<sub>2</sub> NPs. <sup>d</sup>Reactions were carried out using free-CeO<sub>2</sub> NPs.

**(ii) General experimental procedure for the free-CeO<sub>2</sub> NPs catalyzed Michael addition of active methylene compounds to conjugated alkenes:**

**Representative example for the Michael addition of 5,5-dimethyl-1,3-cyclohexadione to MVK (Entry 13, Table 1):**

MVK (140.18 mg, 2 mmol) was added to a mixture of 5,5-dimethyl-1,3-cyclohexadione (140 mg, 1 mmol) and CeO<sub>2</sub> NP (~ 8.5 mg, 5 wt %) in water (0.5 mL) and stirred the mixture for 4 h until completion of reaction (TLC). The reaction mixture was centrifuged for 5 minutes and the aqueous part was extracted with ethyl acetate, dried over anhydrous Na<sub>2</sub>SO<sub>4</sub> and evaporated the solvent to leave crude product, which was purified by short column chromatography over silica gel (ethyl acetate: hexane 1:9) to provide pure bis-Michael adduct, 5,5-Dimethyl-2,2-bis-(3-oxo-butyl)-cyclohexane-1,3-dione as white solid in excellent yield (252 mg, 90 %). The product was characterized by its IR and <sup>1</sup>H NMR and <sup>13</sup>C NMR spectroscopic data and compared with reported one. The NPs were washed with ethanol and reused for subsequent runs. This procedure was followed for all the reactions listed in Table 1 in main manuscript.

**Table 2S Comparative study of catalysts for bis-Michael addition reactions**

| Sl. No.  | Catalyst                                                                   | Time (h)   | Yield (%)    | Ref.                 |
|----------|----------------------------------------------------------------------------|------------|--------------|----------------------|
| 1        | <i>Trans</i> -hydrido( <i>n'</i> - <i>o</i> -enolato)ruthenium(II) complex | 46-96      | 60-89        | 18                   |
| 2        | SiO <sub>2</sub> NPs                                                       | 3-5        | 70-90        | 4(d)                 |
| 3        | [bmIm]OH                                                                   | 1-4        | 80-96        | 19                   |
| <b>4</b> | <b>CeO<sub>2</sub> NPs</b>                                                 | <b>3-7</b> | <b>72-90</b> | <b>Present Study</b> |

**ESI-4: General experimental procedure for the free-CeO<sub>2</sub> NPs catalyzed allylation of active methylene compounds: Representative example for the allylation of malononitrile with allyl iodide (Entry 2, Table 2):**

A mixture of allyl iodide (1 mmol), malonitrile (1 mmol) and CeO<sub>2</sub> NP was stirred for 10 h until completion of reaction (TLC). The reaction mixture was centrifuged for 5 minutes and the aqueous part was extracted with ethyl acetate, dried over anhydrous Na<sub>2</sub>SO<sub>4</sub> and evaporated the solvent to leave crude product, which was purified by short column chromatography over silica gel (ethyl acetate: hexane 3:7) to provide pure 2-Allyl-malononitrile (84 mg, 80%) as a pale yellow liquid.

All the products listed in Table 2 and Table 3 are known and were characterized by spectroscopic data and compared these data with reported values<sup>1-2</sup>

Copy of <sup>1</sup>H NMR spectra of all products listed in Table 1 and Table 2 were given below.

Supporting Information 7

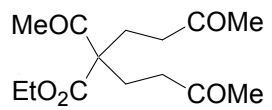

Entry 1, Table 2: <sup>1</sup>H NMR

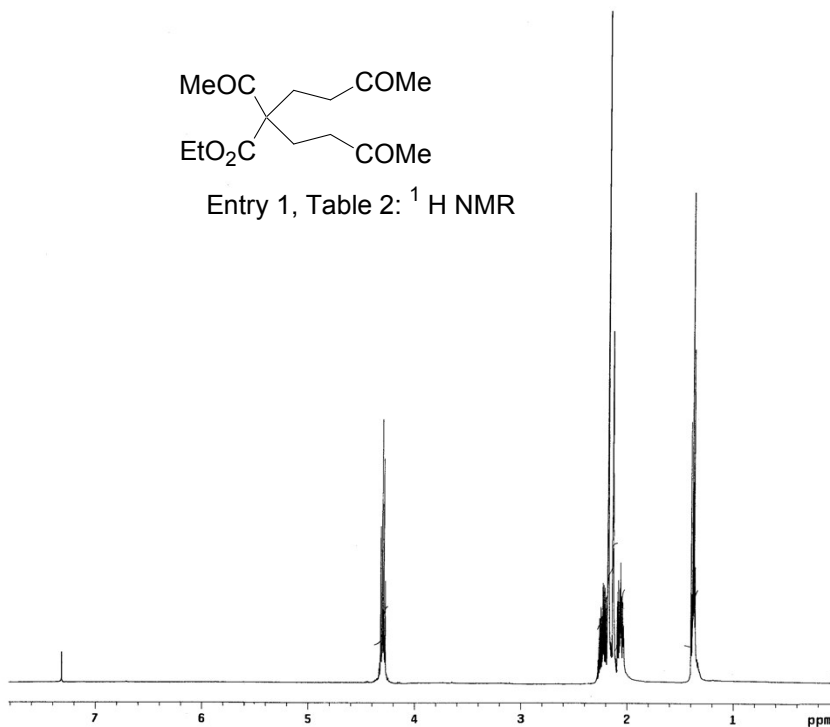

Supporting Information 8

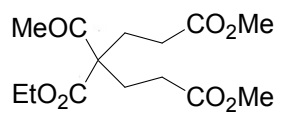

Entry 2, Table 2: <sup>1</sup>H NMR

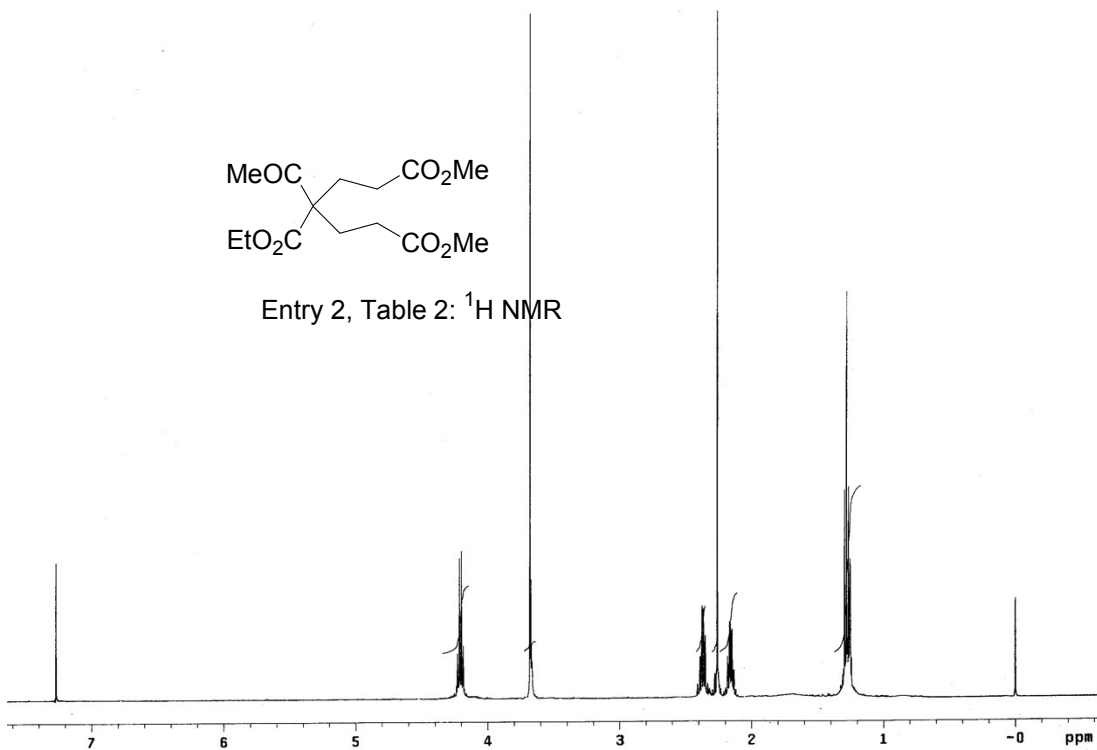



Supporting Information 9

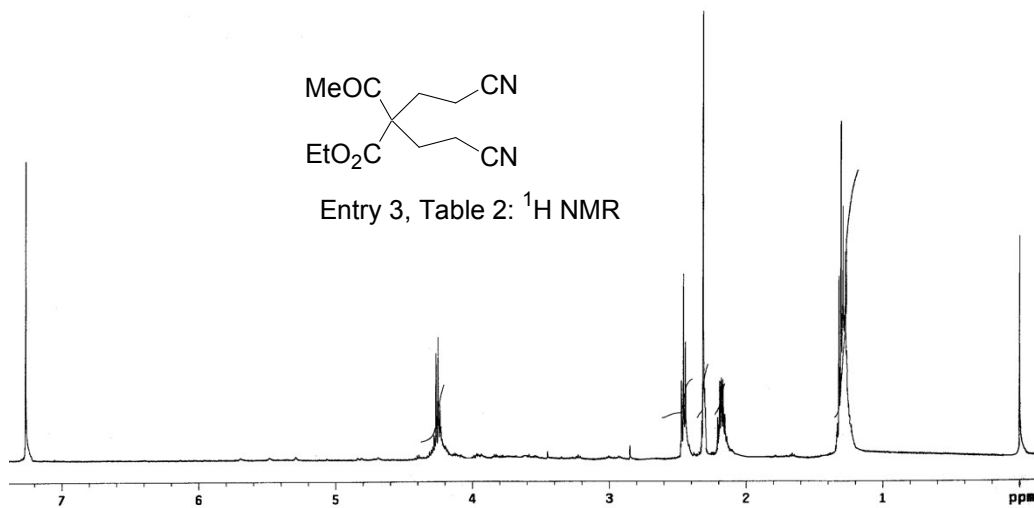

Supporting Information 10

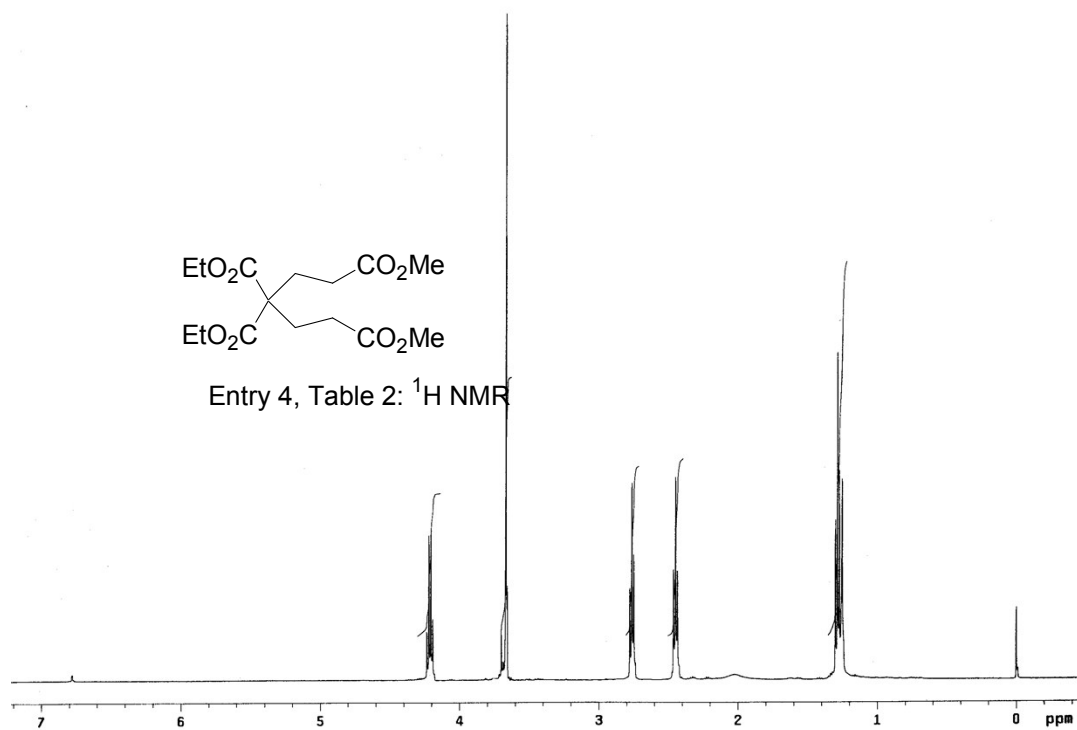

Supporting Information 11

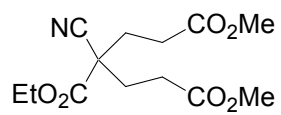

Entry 5, Table 2: <sup>1</sup>H NMR

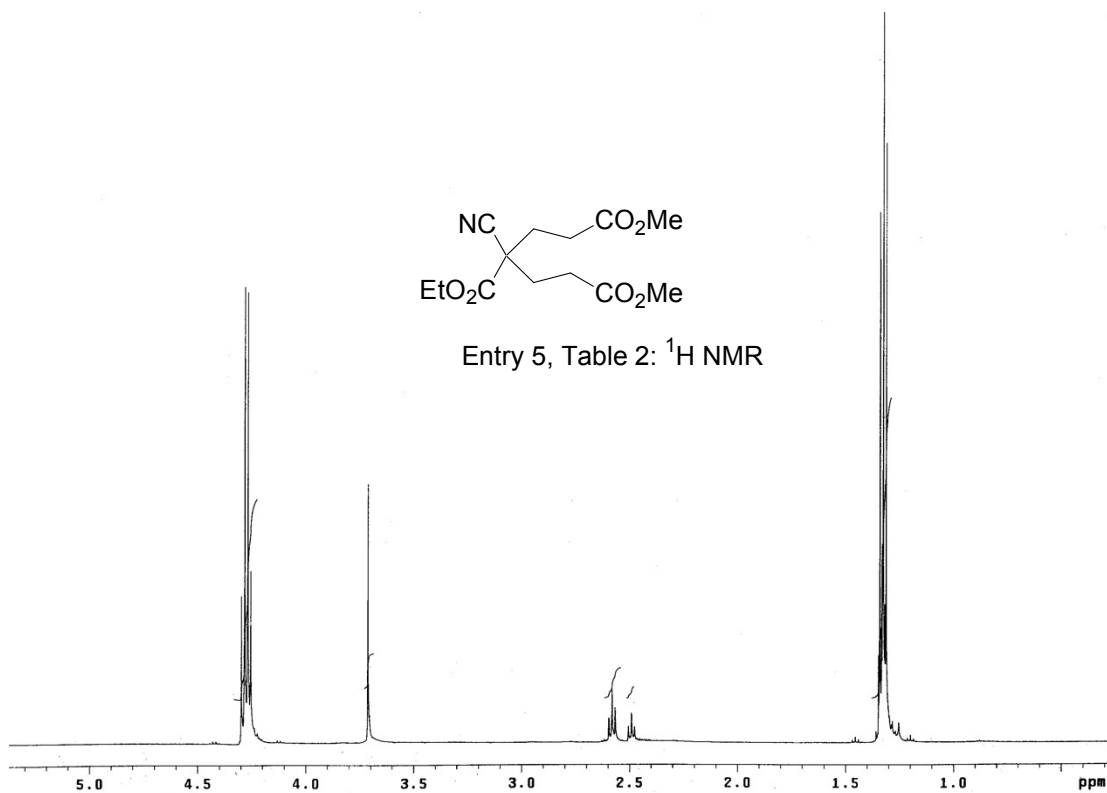

Supporting Information 12

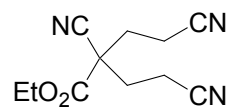

Entry 6, Table 2: <sup>1</sup>H NMR

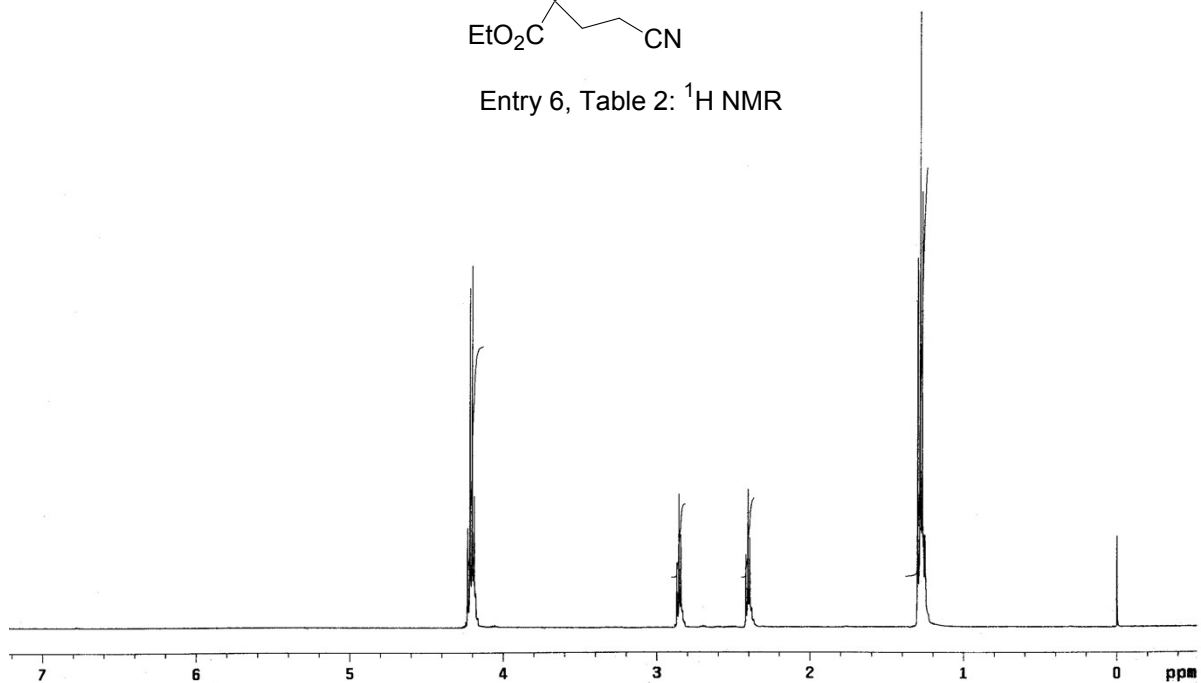

Supporting Information 13

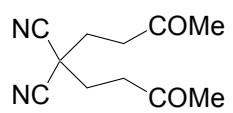

Entry 7, Table 2:  $^1\text{H}$  NMR

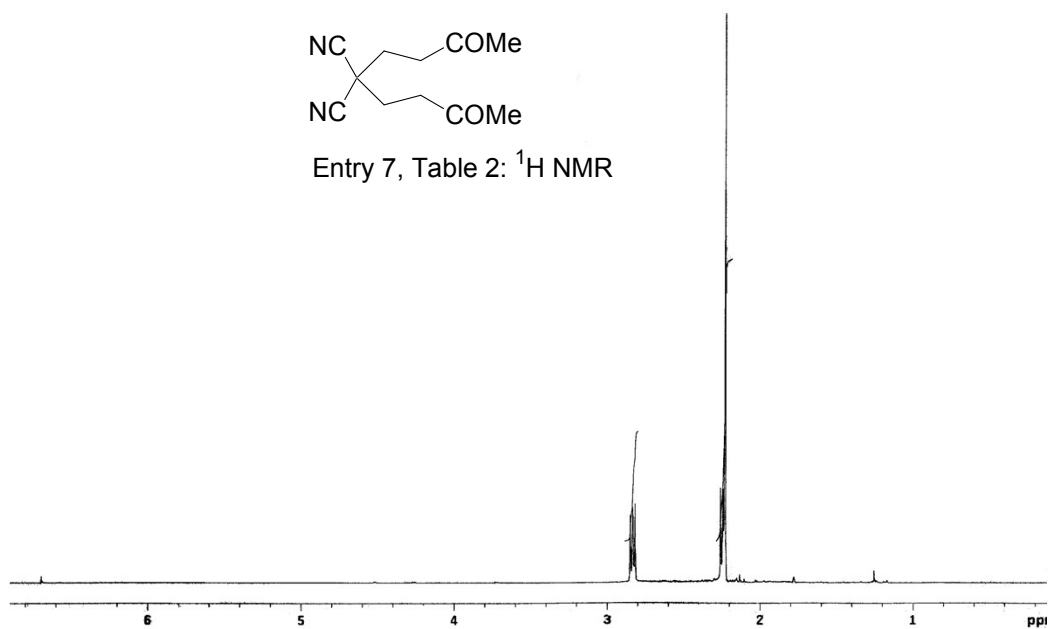

Supporting Information 14

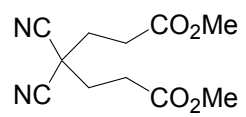

Entry 8, Table 2: <sup>1</sup>H NMR

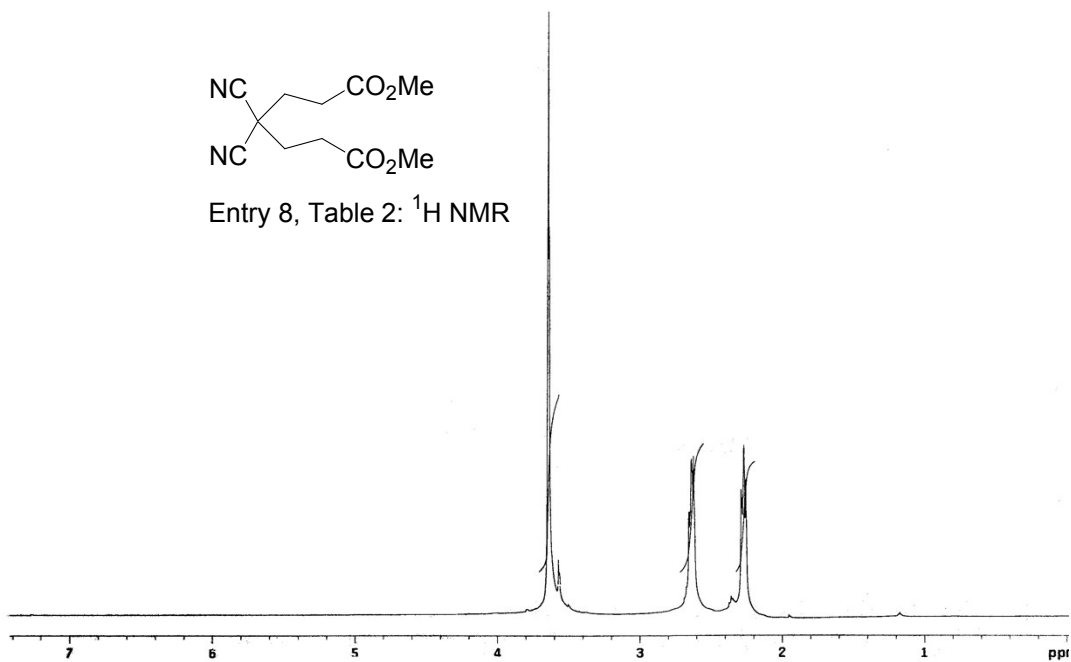

Supporting Information 15

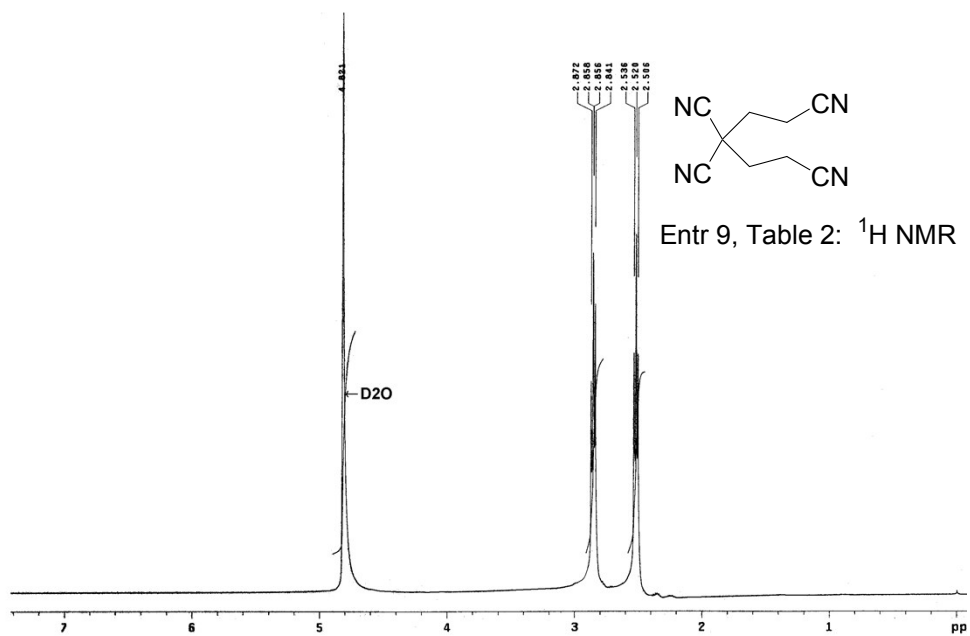

Supporting Information 16

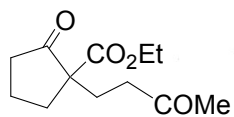

Entry 10, Table 2:  $^1\text{H}$  NMR

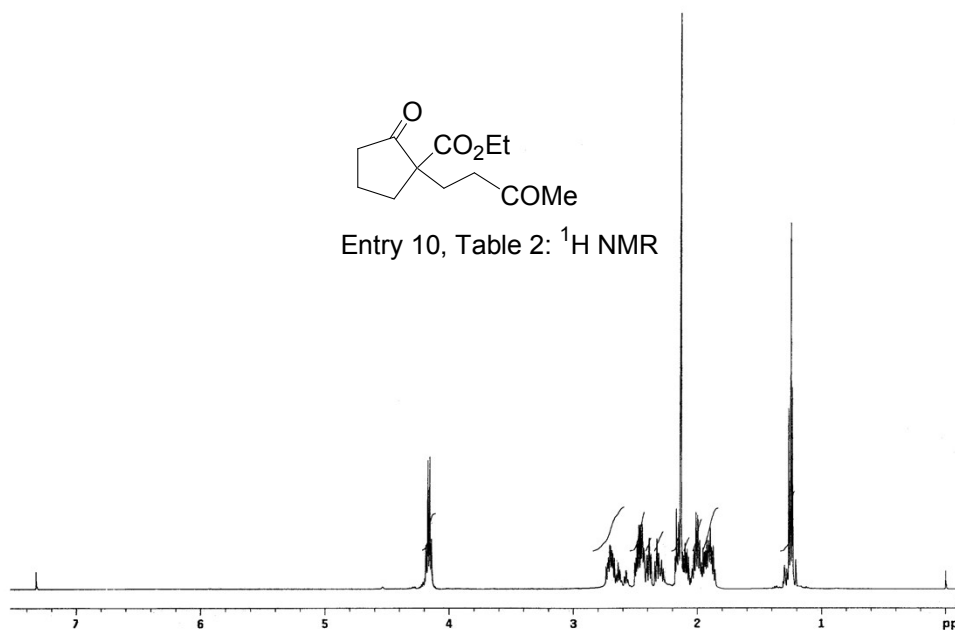



Supporting Information 17

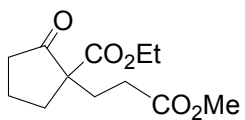

Entry 11, Table 2: <sup>1</sup>H NMR

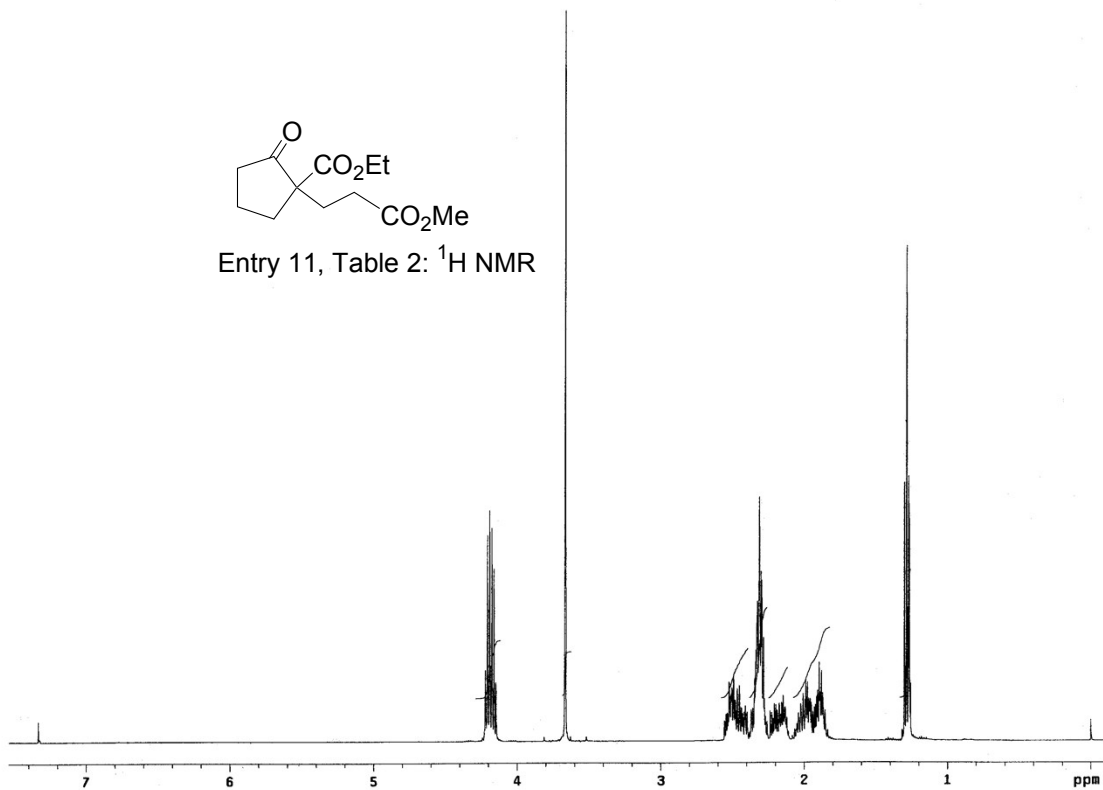

Supporting Information 18

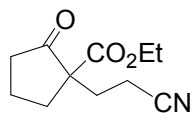

Entry 12, Table 2: <sup>1</sup>H NMR

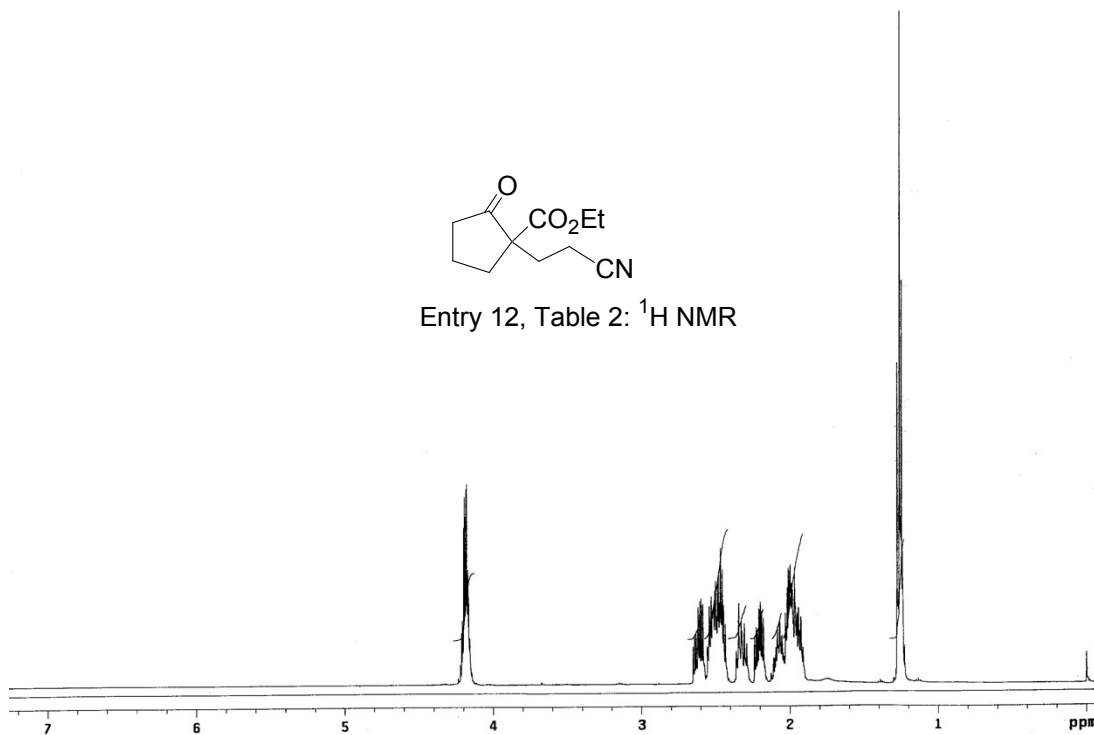

Supporting Information 19

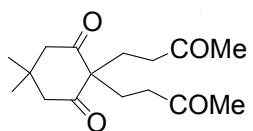

Entry 13, Table 2: <sup>1</sup>H NMR

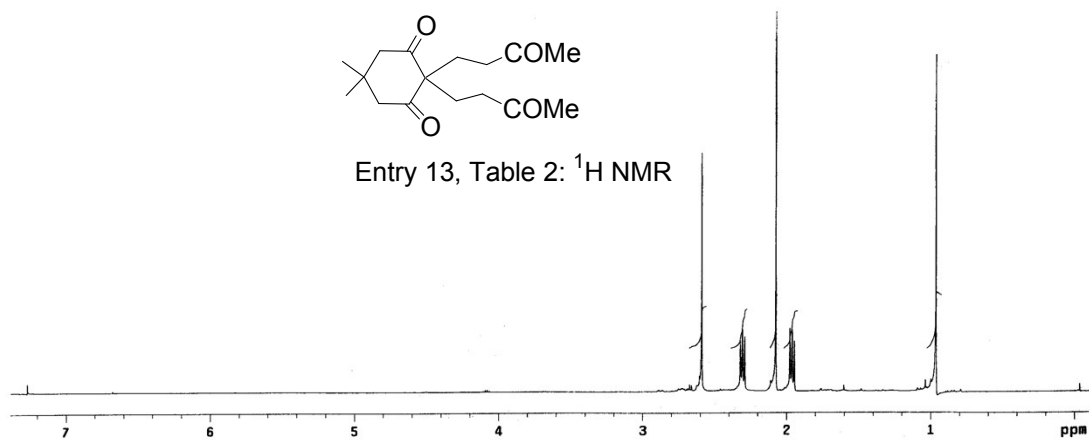

Supporting Information 20

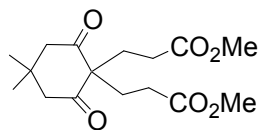

Entry 14, Table 2: <sup>1</sup>H NMR

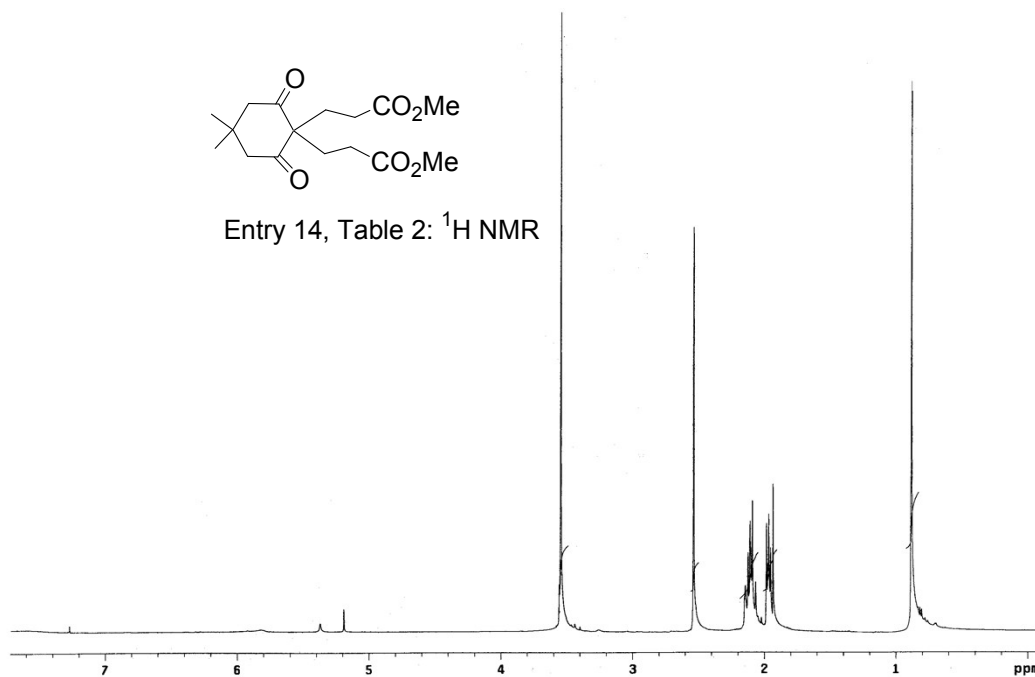

Supporting Information 21

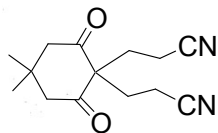

Entry 15, Table 2;  $^1\text{H}$  NMR

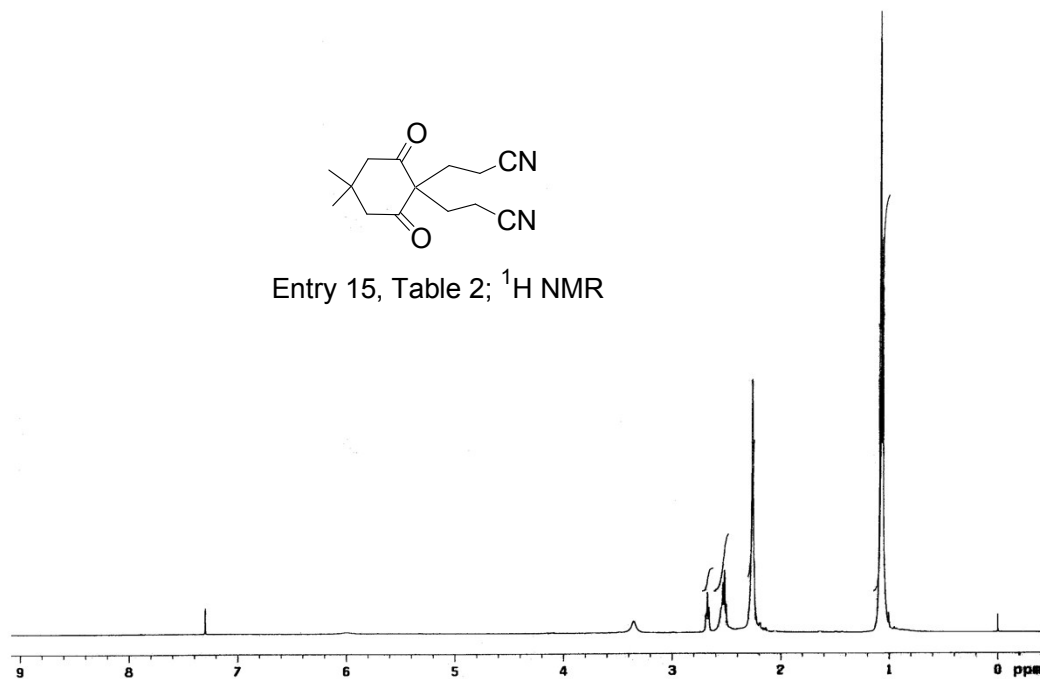

Supporting Information 22

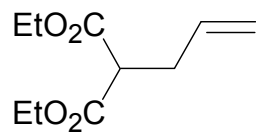

Entry 1 in Table 3; <sup>1</sup>H NMR

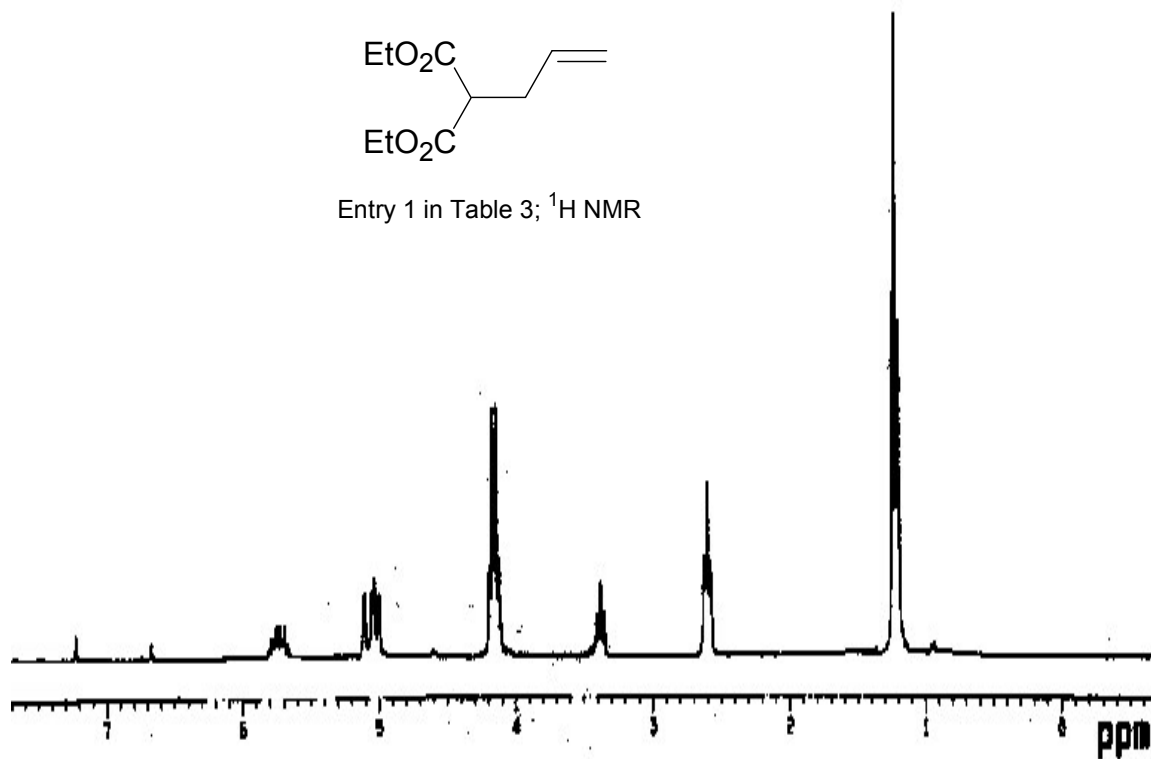

Supporting Information 23

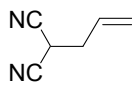

Entry 2 in Table 3; <sup>1</sup>H NMR

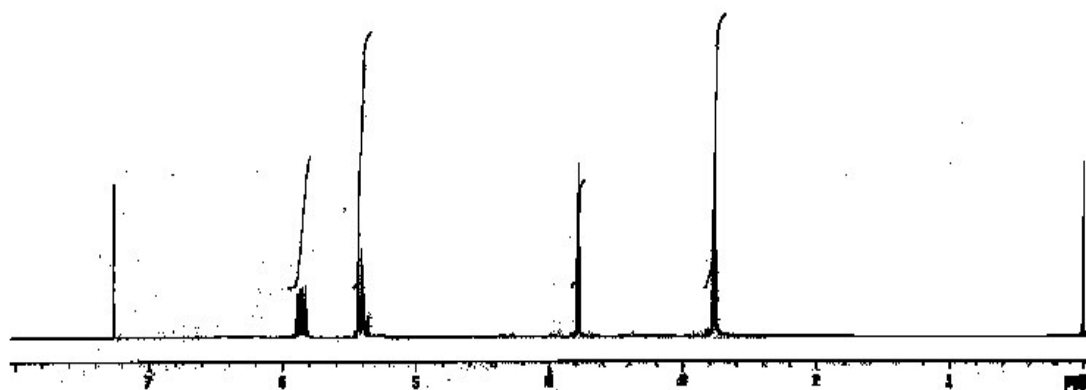

Supporting Information 24

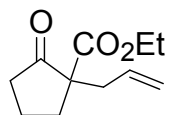

Entry 3 in Table 3; <sup>1</sup>H NMR

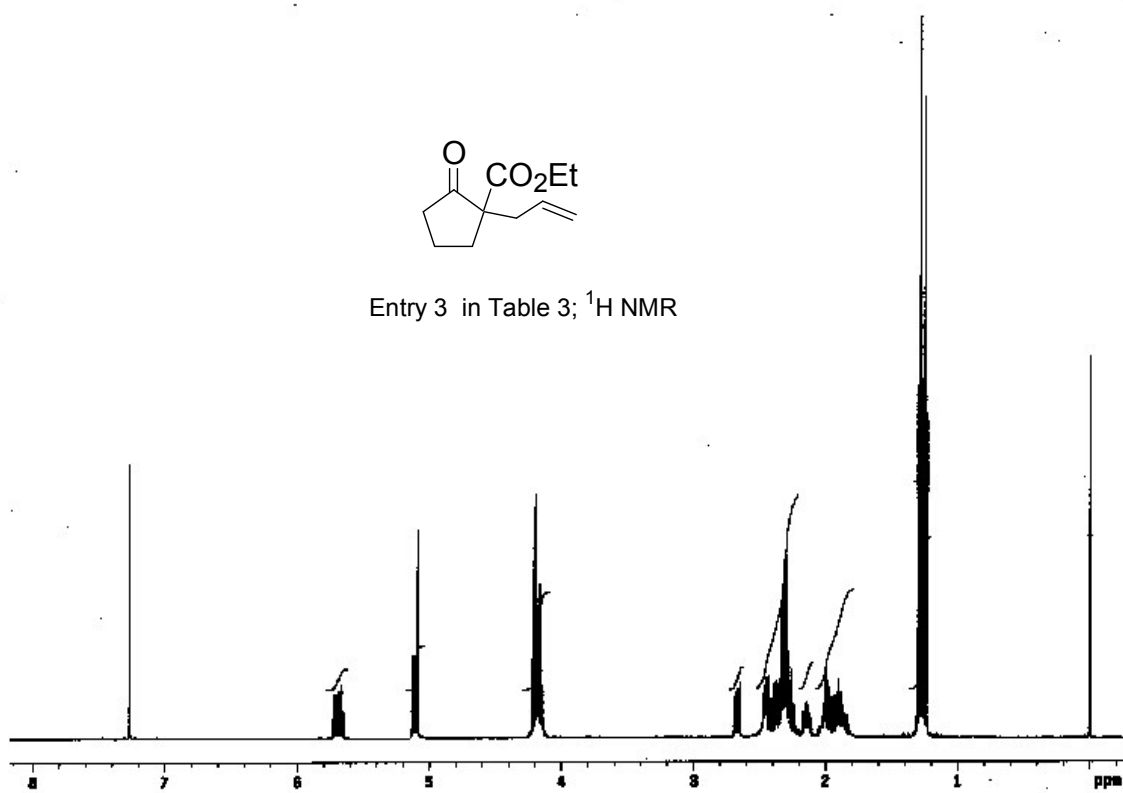



FT-IR spectra of fresh and reused CeO<sub>2</sub> NPs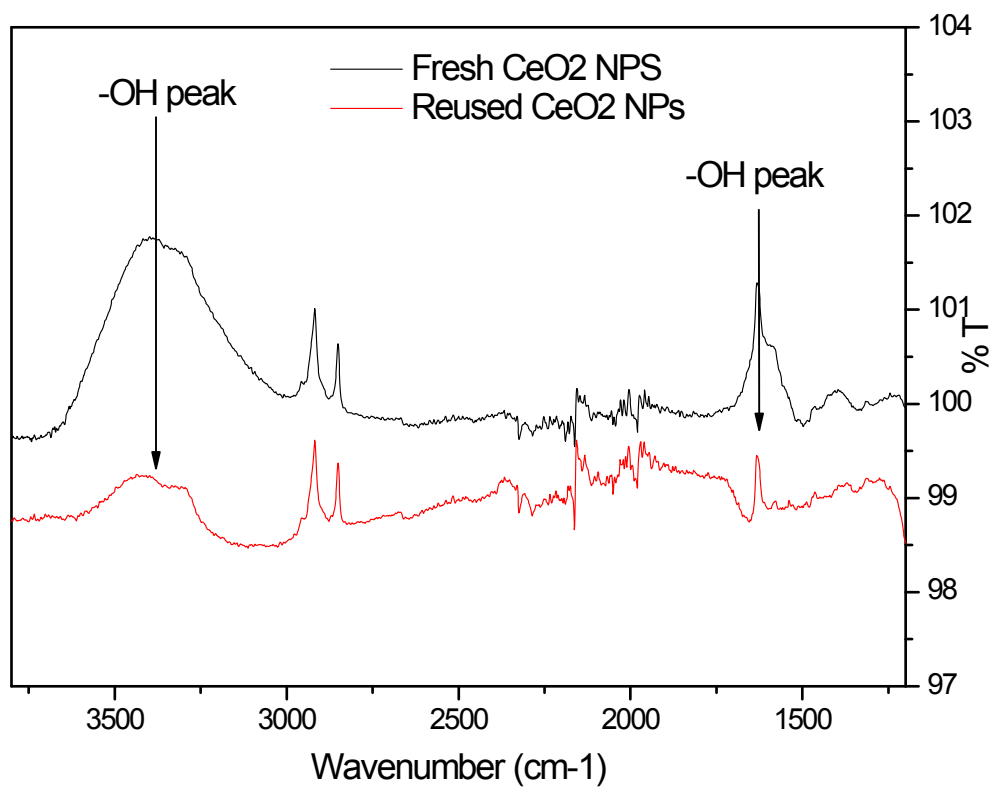

**References:**

1. S. Banerjee and S. Santra, *Tetrahedron Lett.*, 2009, **50**, 2037.
2. B. C. Ranu, K. C. Chattopadhyay and L. Adak, *Org. Lett.*, 2007, **9**, 4595.
